# Supplementary material
Source: PubMed Central journal article supplement (PMC3887821)
Supplement: molcell-34-2-127-3-supplementary.pdf [file molcell-34-2-127-3-supplementary.pdf]

**Table 1.** Genes that are expressed differentially ( $\geq 2.0$ -fold) upon surplus iron for 1 h<sup>a</sup>.

| <b>Genes expression induced by more than 2-fold upon surplus iron for 1 h ( 9 ORFs)</b>   |                |                        |                            |                                                                   |
|-------------------------------------------------------------------------------------------|----------------|------------------------|----------------------------|-------------------------------------------------------------------|
| <b>Gene</b>                                                                               | <b>ORF</b>     | <b>Induction fold</b>  | <b>GO term<sup>b</sup></b> | <b>Gene description</b>                                           |
| <i>CUP1-1</i>                                                                             | YHR053C        | 5.83                   | GO:0046872                 | Copper ion binding (response to copper ion)                       |
| <i>CUP1-2</i>                                                                             | YHR056C        | 5.83                   | GO:0008270                 | Copper ion binding (response to copper ion)                       |
| <i>PDR12</i>                                                                              | YPL058C        | 4.90                   | GO:0016887                 | Xenobiotic-transporting ATPase (response to copper ion)           |
| <b><i>HSP12</i></b>                                                                       | <b>YFL014W</b> | <b>4.61</b>            | <b>GO:0008289</b>          | <b>Protects membranes from desiccation (response to stress)</b>   |
| <i>CRS5</i>                                                                               | YOR031W        | 2.48                   | GO:0005507                 | Copper ion binding (response to metal ion)                        |
| <i>RGS2</i>                                                                               | YOR107W        | 2.41                   | GO:0005096                 | GTPase activator activity (G-protein signaling)                   |
| <b><i>MTH1</i></b>                                                                        | <b>YDR277C</b> | <b>2.27</b>            | <b>GO:0003674</b>          | <b>Negative regulator of glucose-sensing signal transduction</b>  |
| <i>CHA1</i>                                                                               | YCL064C        | 2.13                   | GO:0003941                 | Catabolic L-serine (L-threonine) deaminase                        |
| -                                                                                         | YKR075C        | 2.23                   | -                          | Molecular function unknown, expression regulated by glucose       |
| <b><i>MSN4<sup>c</sup></i></b>                                                            | <b>YKL062W</b> | <b>1.50</b>            | GO:0003700                 | <b>Transcriptional activator (activated in stress conditions)</b> |
| <b>Genes expression repressed by more than 2-fold upon surplus iron for 1 h (39 ORFs)</b> |                |                        |                            |                                                                   |
| <b>Gene</b>                                                                               | <b>ORF</b>     | <b>Repression fold</b> | <b>GO term<sup>b</sup></b> | <b>Gene description</b>                                           |
| <b>Iron homeostasis (17 ORFs)</b>                                                         |                |                        |                            |                                                                   |
| <i>ARN1</i>                                                                               | YHL040C        | 0.43                   | GO:0015343                 | Siderophore-iron transport                                        |
| <i>ARN2</i>                                                                               | YHL047C        | 0.23                   | GO:0015343                 | Siderophore-iron transport                                        |
| <i>CCC2</i>                                                                               | YDR270W        | 0.50                   | GO:0019829                 | Siderophore-iron transport                                        |
| <i>ENB1</i>                                                                               | YOL158C        | 0.09                   | GO:0015620                 | Siderophore transport                                             |
| <i>FET3</i>                                                                               | YMR058W        | 0.06                   | GO:0004322                 | High affinity iron ion transport                                  |
| <i>FET4</i>                                                                               | YMR319C        | 0.38                   | GO:0005381                 | Low-affinity Fe <sup>2+</sup> transporter of the plasma membrane  |
| <i>FIT1</i>                                                                               | YDR534C        | 0.12                   | GO:0003674                 | Mannoprotein for retention of siderophore-iron in cell wall       |
| <i>FIT2</i>                                                                               | YOR382W        | 0.08                   | GO:0003674                 | Mannoprotein for retention of siderophore-iron in cell wall       |
| <i>FIT3</i>                                                                               | YOR383C        | 0.37                   | GO:0003674                 | Mannoprotein for retention of siderophore-iron in cell wall       |
| <i>FRE1</i>                                                                               | YLR214W        | 0.04                   | GO:0000293                 | Ferric-chelate reductase activity                                 |
| <i>FRE2</i>                                                                               | YKL220C        | 0.14                   | GO:0000293                 | Ferric-chelate reductase activity                                 |
| <i>FRE6</i>                                                                               | YLL051C        | 0.47                   | GO:0000293                 | Ferric-chelate reductase activity                                 |
| <i>FRE7</i>                                                                               | YOL152W        | 0.08                   | GO:0000293                 | Ferric-chelate reductase activity                                 |
| <i>FTR1</i>                                                                               | YER145C        | 0.16                   | GO:0005381                 | High affinity iron ion transport                                  |
| <i>SIT1</i>                                                                               | YEL065W        | 0.07                   | GO:0015344                 | Siderophore transport                                             |
| <i>SMF3</i>                                                                               | YLR034C        | 0.44                   | GO:0005381                 | Divalent metal ion transporter involved in iron homeostasis       |
| <i>TIS11</i>                                                                              | YLR136C        | 0.08                   | GO:0003729                 | mRNA-binding protein expressed during iron starvation             |
| <b>Others (22 ORFs)</b>                                                                   |                |                        |                            |                                                                   |

The genes are up-regulated or down-regulated both in 1h and 4h are in bold font.

<sup>a</sup>Genes were grouped into these categories according to the *S. cerevisiae* Genome Database and the Munich Information Center for Protein Sequence (<http://www.mips.biochem.mpg.de/proj/yeast>).

<sup>b</sup>The GO term is assigned based on the molecular function.

<sup>c</sup>The genes that are induced between 1.5-fold and 2.0-fold upon surplus iron.

**Table 2.** Genes that are expressed differentially ( $\geq 2.0$ -fold) upon surplus iron for 4 h<sup>a</sup>.

| <b>Genes expression induced by more than 2-fold upon surplus iron for 4 h ( 140 ORFs)</b> |            |                       |                            |                                                                           |
|-------------------------------------------------------------------------------------------|------------|-----------------------|----------------------------|---------------------------------------------------------------------------|
| <b>Gene</b>                                                                               | <b>ORF</b> | <b>Induction fold</b> | <b>GO term<sup>b</sup></b> | <b>Gene description</b>                                                   |
| <b><i>TCA cycle, electron transport, and oxidative phosphorylation (43 ORFs)</i></b>      |            |                       |                            |                                                                           |
| <i>CYT1</i>                                                                               | YOR065W    | 28.77                 | GO:0045153                 | Cytochrome c1, component of mitochondrial respiratory chain               |
| <i>CYC1</i>                                                                               | YJR048W    | 17.20                 | GO:0009055                 | Cytochrome c, isoform 1                                                   |
| <i>SDH1</i>                                                                               | YKL148C    | 12.47                 | GO:0008177                 | Flavoprotein subunit of succinate dehydrogenase                           |
| <i>QCR2</i>                                                                               | YPR191W    | 6.87                  | GO:0008177                 | Subunit 2 of the ubiquinol cytochrome-c reductase complex                 |
| <i>QCR7</i>                                                                               | YDR529C    | 6.34                  | GO:0008121                 | Subunit 7 of the ubiquinol cytochrome-c reductase complex                 |
| <i>RIP1</i>                                                                               | YEL024W    | 5.96                  | GO:0008121                 | Ubiquinol-cytochrome-c reductase                                          |
| <i>INH1</i>                                                                               | YDL181W    | 5.92                  | GO:0004857                 | Inhibits ATP hydrolysis by the F <sub>1</sub> F <sub>0</sub> ATP synthase |
| <i>COR1</i>                                                                               | YBL045C    | 4.71                  | GO:0008121                 | Core subunit of the ubiquinol-cytochrome c reductase complex              |
| <i>BNA4</i>                                                                               | YBL098W    | 3.82                  | GO:0004502                 | Kynurenine 3-mono oxygenase of the TCA cycle                              |
| <i>COX7</i>                                                                               | YMR256C    | 3.73                  | GO:0004129                 | Subunit VII of cytochrome c oxidase                                       |
| <i>COX17</i>                                                                              | YLL009C    | 3.71                  | GO:0008379                 | Copper metallochaperone                                                   |
| <i>SDH4</i>                                                                               | YDR178W    | 3.46                  | GO:0008177                 | Membrane anchor subunit of succinate dehydrogenase                        |
| <i>SDH3</i>                                                                               | YKL141W    | 3.39                  | GO:0008177                 | Cytochrome b subunit of succinate dehydrogenase                           |
| <i>COX12</i>                                                                              | YLR038C    | 3.28                  | GO:0004129                 | Subunit VIb of cytochrome c oxidase                                       |
| <i>QCR9</i>                                                                               | YGR183C    | 3.26                  | GO:0008121                 | Subunit 9 of the ubiquinol cytochrome-c reductase complex                 |
| <i>QCR8</i>                                                                               | YJL166W    | 3.22                  | GO:0008121                 | Subunit 8 of the ubiquinol cytochrome-c reductase complex                 |
| <i>PHO3</i>                                                                               | YBR092C    | 3.12                  | GO:0003993                 | Constitutively expressed acid phosphatase, aerobic respiration            |
| <i>TIM11</i>                                                                              | YDR322C-A  | 3.04                  | GO:0005198                 | Subunit e of mitochondrial F <sub>1</sub> F <sub>0</sub> ATPase           |
| <i>COX5B</i>                                                                              | YIL111W    | 3.01                  | GO:0004129                 | Subunit Vb of cytochrome c oxidase                                        |
| <i>COX8</i>                                                                               | YLR395C    | 3.00                  | GO:0004129                 | Subunit VIII of cytochrome c oxidase                                      |
| <i>FMP10</i>                                                                              | YER182W    | 2.92                  | GO:0003674                 | Found in mitochondrial proteome                                           |
| <i>ATP19</i>                                                                              | YOL077W-A  | 2.84                  | GO:0046933                 | Subunit k of the mitochondrial F <sub>1</sub> F <sub>0</sub> ATP synthase |
| <i>ATP20</i>                                                                              | YPR020W    | 2.80                  | GO:0005198                 | Subunit g of the mitochondrial F <sub>1</sub> F <sub>0</sub> ATP synthase |
| <i>UGP1</i>                                                                               | YKL035W    | 2.59                  | GO:0003983                 | UDP-glucose pyrophosphorylase                                             |
| <i>MDH1</i>                                                                               | YKL085W    | 2.57                  | GO:0030060                 | Mitochondrial malate dehydrogenase                                        |

|                                        |                     |             |                   |                                                                                       |
|----------------------------------------|---------------------|-------------|-------------------|---------------------------------------------------------------------------------------|
| <i>COX5A</i>                           | YNL052W             | 2.46        | GO:0004129        | Subunit Va of cytochrome c oxidase                                                    |
| <i>COX15</i>                           | YER141W             | 2.41        | GO:0016653        | An prosthetic group for cytochrome c oxidase                                          |
| <i>ATP4</i>                            | YPL078C             | 2.40        | GO:0046933        | Subunit b of stator stalk of mitochondrial F <sub>1</sub> F <sub>o</sub> ATP synthase |
| <i>ATP7</i>                            | YKL016C             | 2.37        | GO:0046933        | Subunit d of stator stalk of mitochondrial F <sub>1</sub> F <sub>o</sub> ATP synthase |
| <i>PPA2</i>                            | YMR267<br>W         | 2.36        | GO:0004427        | Mitochondrial inorganic pyrophosphatase                                               |
| <i>COX13</i>                           | YGL191W             | 2.21        | GO:0004129        | Subunit VIa of cytochrome c oxidase                                                   |
| <i>HEM15</i>                           | YOR176W             | 2.18        | GO:0004325        | Ferrochelatase                                                                        |
| <i>ATP5</i>                            | YDR298C             | 2.12        | GO:0046933        | Subunit 5 of stator stalk of mitochondrial F <sub>1</sub> F <sub>o</sub> ATP synthase |
| <i>FMC1</i>                            | YIL098C             | 2.08        | GO:0003674        | Required for assembly of mitochondrial F <sub>1</sub> F <sub>o</sub> ATP synthase     |
| <i>LSC2</i>                            | YGR244C             | 2.07        | GO:0004775        | Beta subunit of succinyl-CoA ligase                                                   |
| <i>KGD1</i>                            | YIL125W             | 2.07        | GO:0004591        | Oxidative decarboxylation of alpha-ketoglutarate                                      |
| <i>SCO2</i>                            | YBR024W             | 2.06        | GO:0008379        | Delivery of copper to cytochrome c oxidase                                            |
| <i>MBA1</i>                            | YBR185C             | 2.06        | GO:0043022        | Involved in assembly of mitochondrial respiratory complexes                           |
| <i>PET100</i>                          | YDR079W             | 2.03        | GO:0051082        | Chaperone that facilitates assembly of cytochrome c oxidase                           |
| <i>ATP11</i>                           | YNL315C             | 2.03        | GO:0051082        | Required for assembly of mitochondrial F <sub>1</sub> F <sub>o</sub> ATP synthase     |
| <i>CIT1</i>                            | YNR001C             | 2.00        | GO:0004108        | Citrate synthase                                                                      |
| <i>STF2<sup>b</sup></i>                | YGR008C             | 1.61        |                   | Regulation of the mitochondrial F <sub>1</sub> F <sub>o</sub> ATP synthase            |
| <b><i>Stress response (9 ORFs)</i></b> |                     |             |                   |                                                                                       |
| <i>CCP1</i>                            | YKR066C             | 5.53        | GO:0004130        | Mitochondrial cytochrome c peroxidase                                                 |
| <b><i>HSP12</i></b>                    | <b>YFL014W</b>      | <b>4.78</b> | <b>GO:0008289</b> | <b>Protects membranes from desiccation (response to stress)</b>                       |
| <i>HOR7</i>                            | YMR251<br>W-A       | 3.50        | GO:0003674        | Glycine dehydrogenase, induced under hyperosmotic stress                              |
| <i>YFH1</i>                            | YDL120W             | 2.74        | GO:0008198        | Regulates mitochondrial iron accumulation                                             |
| <i>NFU1</i>                            | YKL040C             | 2.33        | GO:0003674        | Protein involved in iron metabolism in mitochondria                                   |
| <i>LSP1</i>                            | YPL004C             | 2.32        | GO:0004860        | Involved in activation of stress resistance pathways                                  |
| <i>SOD2</i>                            | YHR008C             | 2.18        | GO:0008383        | Superoxide dismutase, protects cells against oxygen toxicity                          |
| <i>GRX4</i>                            | YER174C             | 2.15        | GO:0030508        | Monothiol glutaredoxin, protects cells from oxidative damage                          |
| <i>HSP10</i>                           | YOR020C             | 2.10        | GO:0051082        | A mitochondrial chaperonin                                                            |
| <i>CCC1</i>                            | YLR220W             | 2.03        | GO:0005384        | Fe <sup>2+</sup> /Mn <sup>2+</sup> transporter preventing iron accumulation           |
| <b><i>MTH1</i></b>                     | <b>YDR277C</b>      | <b>2.03</b> | <b>GO:0003674</b> | <b>Negative regulator of glucose-sensing signal transduction</b>                      |
| <i>GSY1</i>                            | YFR015C             | 2.03        | GO:0004373        | Glycogen synthase, expression induced by stress conditions                            |
| <b><i>MSN4<sup>b</sup></i></b>         | <b>YKL062<br/>W</b> | <b>1.75</b> | <b>GO:0003700</b> | <b>Transcriptional activator (activated in stress conditions)</b>                     |

*HSP31<sup>b</sup>* YDR533C 1.68 GO:0008234 Chaperone and cysteine protease

***Amino acid/protein biosynthesis, assembly and modification (10 ORFs)***

*OPT2* YPR194C 30.57 GO:0015198 Oligopeptide transporter  
*GLT1* YDL171C 3.80 GO:0016040 NAD<sup>+</sup>-dependent glutamate synthase  
*LEU1* YGL009C 3.60 GO:0003861 Isopropylmalate isomerase, involved in the leucine biosynthesis  
*CPR5* YDR304C 3.22 GO:0003755 Peptidyl-prolyl cis-trans isomerase  
*MRP2* YPR166C 2.72 GO:0003735 Mitochondrial ribosomal protein of the small subunit  
*HOM6* YJR139C 2.60 GO:0004412 Homoserine dehydrogenase in methionine biosynthesis  
*MEF2* YJL102W 2.32 GO:0003746 Mitochondrial elongation factor in translational elongation  
*YPR1* YDR368W 2.29 GO:0004032 2-methylbutyraldehyde reductase in isoleucine catabolism  
*SHM2* YLR058C 2.17 GO:0004372 Cytosolic serine hydroxymethyltransferase  
*DPH2* YKL191W 2.16 GO:0003674 Required for synthesis of diphthamide  
*SER3* YER081W 2.10 GO:0004617 3-phosphoglycerate dehydrogenase in serine biosynthesis

***Sugar and lipid synthesis (9 ORFs)***

*UGP1* YKL035W 2.59 GO:0003983 UDP-glucose pyrophosphorylase (UGPase)  
*FAA1* YOR317W 2.54 GO:0004467 Long chain fatty acyl-CoA synthetase  
*LPD1* YFL018C 2.33 GO:0004375 Dihydrolipoamide dehydrogenase  
*DLD2* YDL178W 2.21 GO:0004458 D-lactate dehydrogenase  
*MNT3* YIL014W 2.07 GO:0000033 Alpha-1,3-mannosyltransferase in protein O-glycosylation  
*REG2* YBR050C 2.06 GO:0008599 Regulatory subunit of the Glc7p type-1 protein phosphatase  
*EEB1* YPL095C 2.06 GO:0004026 Acyl-coenzymeA:ethanol O-acyltransferase  
*HXK1* YFR053C 2.02 GO:0004396 Hexokinase isoenzyme 1  
*IMD2* YHR216W 2.01 GO:0003938 Inosine monophosphate dehydrogenase  
*GPH1<sup>c</sup>* YPR160W 1.93 GO:0008184 Glycogen phosphorylase  
*NCE102<sup>c</sup>* YPR149W 1.50 GO:0003674 Component of the glycolipid-enriched complexes

***Cell wall synthesis (4 ORFs)***

*CWP1* YKL096W 6.39 GO:0005199 Cell wall mannoprotein, involved in cell wall organization  
*CWP2* YKL096W -A 5.14 GO:0005199 Cell wall mannoprotein, major constituent of the cell wall  
*KTR6* YPL053C 2.31 GO:0000031 Mannosylphosphate transferase  
*ZEO1* YOL109W 2.10 GO:0003674 Peripheral membrane protein, regulates cell integrity pathway

***Cell fusion, mating and cycle (10 ORFs)***

*MF(ALPHA)* YGL089C 15.41 GO:0000772 Mating pheromone alpha-factor

|                              |         |       |            |                                                                |
|------------------------------|---------|-------|------------|----------------------------------------------------------------|
| <i>FUS1</i>                  | YCL027W | 10.81 | GO:0003674 | Membrane protein, required for cell fusion                     |
| <i>MF(ALPHA)</i><br><i>1</i> | YPL187W | 8.24  | GO:0000772 | Mating pheromone alpha-factor                                  |
| <i>STE3</i>                  | YKL178C | 7.33  | GO:0004933 | Receptor for apha-factor receptor, required for mating         |
| <i>FAR1</i>                  | YJL157C | 3.25  | GO:0004861 | Cyclin-dependent kinase inhibitor                              |
| <i>PBI2</i>                  | YNL015W | 2.26  | GO:0004866 | Cytosolic inhibitor of vacuolar proteinase B                   |
| <i>PNC1</i>                  | YGL037C | 2.25  | GO:0008936 | Nicotinamidase, required for life span extension               |
| <i>GPA1</i>                  | YHR005C | 2.12  | GO:0003924 | GTP-binding alpha subunit, negatively regulates mating         |
| <i>HMLALPHA</i><br><i>1</i>  | YCL066W | 2.03  | GO:0003713 | Transcriptional activator, involved in mating gene expression  |
| <i>MATALPHA1</i>             | YCR040W | 2.03  | GO:0003713 | Transcriptional activator, involved in mating gene expression  |
| <i>MSC1</i>                  | YML128C | 2.02  | GO:0003674 | Mutants are defective in directing meiotic recombination event |

### Others (55 ORFs)

### Genes expression repressed by more than 2-fold upon surplus iron for 4 h ( 206 ORFs)

| Gene                              | ORF         | Repression fold | GO term <sup>b</sup> | Gene description                                                 |
|-----------------------------------|-------------|-----------------|----------------------|------------------------------------------------------------------|
| <i>Iron homeostasis</i> (26 ORFs) |             |                 |                      |                                                                  |
| <i>FIT3</i>                       | YOR383C     | 0.02            | GO:0003674           | Mannoprotein for retention of siderophore-iron in cell wall      |
| <i>FIT2</i>                       | YOR382<br>W | 0.03            | GO:0003674           | Mannoprotein for retention of siderophore-iron in cell wall      |
| <i>FIT1</i>                       | YDR534C     | 0.03            | GO:0003674           | Mannoprotein for retention of siderophore-iron in cell wall      |
| <i>TIS11</i>                      | YLR136C     | 0.04            | GO:0003729           | mRNA-binding protein expressed during iron starvation            |
| <i>ARN1</i>                       | YHL040C     | 0.04            | GO:0015343           | Transporter, siderophore-iron transport                          |
| <i>ARN2</i>                       | YHL047C     | 0.05            | GO:0015343           | Transporter, siderophore-iron transport                          |
| <i>SIT1</i>                       | YEL065W     | 0.07            | GO:0015344           | Siderophore-iron (ferrioxamine) uptake transporter activity      |
| <i>FRE2</i>                       | YKL220C     | 0.08            | GO:0000293           | Ferric-chelate reductase activity                                |
| <i>ENB1</i>                       | YOL158C     | 0.08            | GO:0015620           | Ferric-enterobactin transport activity                           |
| <i>FET3</i>                       | YMR058<br>W | 0.12            | GO:0004322           | High affinity iron ion transport                                 |
| <i>FRE3</i>                       | YOR381W     | 0.15            | GO:0000293           | Iron ion homeostasis                                             |
| <i>ISU2</i>                       | YOR226C     | 0.18            | GO:0003674           | Iron ion homeostasis                                             |
| <i>ECL1</i>                       | YGR146C     | 0.18            | GO:0003674           | Induced by iron homeostasis transcription factor Aft2p           |
| <i>FET4</i>                       | YMR319C     | 0.21            | GO:0005381           | Low-affinity Fe <sup>2+</sup> transporter of the plasma membrane |
| <i>ISU1</i>                       | YPL135W     | 0.22            | GO:0005515           | Iron ion homeostasis                                             |
| <i>MRS4</i>                       | YKR052C     | 0.23            | GO:0005381           | Mitochondrial iron transporter of the mitochondrial              |

|             |                           |             |                   |                                                                         |
|-------------|---------------------------|-------------|-------------------|-------------------------------------------------------------------------|
|             |                           |             |                   | carrier family                                                          |
| <i>HMX1</i> | YLR205C                   | 0.24        | GO:0004601        | Heme-binding, iron ion homeostasis                                      |
| <i>FTH1</i> | YBR207W                   | 0.24        | GO:0005381        | High affinity iron transporter                                          |
| <i>CCC2</i> | <b>YDR270</b><br><b>W</b> | <b>0.24</b> | <b>GO:0019829</b> | <b>Cu<sup>2+</sup>-transporting P-type ATPase, iron ion homeostasis</b> |
| <i>FTR1</i> | <b>YER145C</b>            | <b>0.27</b> | <b>GO:0005381</b> | <b>High affinity iron ion transport</b>                                 |
| <i>FRE1</i> | <b>YLR214W</b>            | <b>0.27</b> | <b>GO:0000293</b> | <b>Ferric-chelate reductase activity</b>                                |
| <i>SMF3</i> | <b>YLR034C</b>            | <b>0.31</b> | <b>GO:0005381</b> | <b>Divalent metal ion transporter involved in iron homeostasis</b>      |
| <i>VHT1</i> | YGR065C                   | 0.31        | GO:0015225        | Vitamin H symporter, negatively regulated by iron deprivation           |
| <i>RCS1</i> | YGL071W                   | 0.33        | GO:0003700        | Transcription factor in iron utilization and homeostasis                |
| <i>FRE6</i> | <b>YLL051C</b>            | <b>0.39</b> | <b>GO:0000293</b> | <b>Ferric-chelate reductase activity</b>                                |
| <i>FRE7</i> | <b>YOL152</b><br><b>W</b> | <b>0.41</b> | <b>GO:0000293</b> | <b>Ferric-chelate reductase activity</b>                                |

#### *Anaerobic respiration (10 ORFs)*

|               |         |      |            |                                                               |
|---------------|---------|------|------------|---------------------------------------------------------------|
| <i>DAN4</i>   | YJR151C | 0.20 | GO:0003674 | Cell wall mannoprotein, expressed under anaerobic condition   |
| <i>TIR3</i>   | YIL011W | 0.21 | GO:0003674 | Cell wall mannoprotein, expressed under anaerobic condition   |
| <i>TIR1</i>   | YER011W | 0.24 | GO:0005199 | Cell wall mannoprotein, expressed under anaerobic condition   |
| <i>TIR4</i>   | YOR009W | 0.27 | GO:0003674 | Cell wall mannoprotein, expressed under anaerobic condition   |
| <i>PAU2</i>   | YEL049W | 0.30 | GO:0003674 | Part of seripauperin family, negatively regulated by oxygen   |
| <i>DAN2</i>   | YLR037C | 0.30 | GO:0003674 | Cell wall mannoprotein, expressed under anaerobic condition   |
| <i>PAU7</i>   | YAR020C | 0.31 | GO:0003674 | Part of seripauperin family, negatively regulated by oxygen   |
| <i>PAU5</i>   | YFL020C | 0.35 | GO:0003674 | Part of seripauperin family, negatively regulated by oxygen   |
| <i>DAN3</i>   | YBR301W | 0.36 | GO:0003674 | Cell wall mannoprotein, expressed under anaerobic condition   |
| <i>NCE103</i> | YNL036W | 0.37 | GO:0004089 | Carbonic anhydrase poorly transcribed under aerobic condition |

#### **Others (170 ORFs)**

---

The genes are up-regulated or down-regulated both in 1h and 4h are in bold font, and the target genes of Msn2/4 are also underlined.

<sup>a</sup>Genes were grouped into these categories according to the *S. cerevisiae* Genome Database and the Munich Information Center for Protein Sequence (<http://www.mips.biochem.mpg.de/proj/yeast>).

<sup>b</sup>The GO term is assigned based on the molecular function.

<sup>c</sup>The genes that are induced between 1.5-fold and 2.0-fold upon surplus iron.
